# Supplementary material
Source: MDPI journal article supplement (https://www.mdpi.com/1099-4300/16/6/3482)
Supplement: s1 [file s1]

## Supplementary Information

### 1. Thermodynamic Entropy

#### 1.1. Mass and Energy Budget for an Open System in Non-Thermal Equilibrium

For open large systems experiencing non-thermal equilibrium it is possible to define an elemental volume where we can assume local equilibrium. Both intensive and extensive variables can be defined at this local domain. On the one hand, the intensive quantities such as temperature and pressure can be defined directly. On the other hand, it is possible to define the extensive variables by implementing the respective densities. Therefore, the concept of elemental volumes and local equilibrium allows us to define all thermodynamics variables as a function of space and time [1].

The mass balance for a component  $k$  in an elemental volume is given by:

$$\frac{dn_k}{dt} + \nabla \cdot \frac{\mathbf{I}_k}{M_k} - \sum_j \nu_{j,k} v_j = 0. \quad (\text{S1})$$

In this equation the  $n_k$  refers to number of mols of component  $k$  per unit volume,  $\mathbf{I}_k$  refers to the flux of component in [mass/area/time],  $M_k$  is the molar mass of component  $k$  in  $[\frac{\text{Mass}}{\text{mol}}]$ ,  $\nu_{j,k}$  is the stoichiometric coefficient for component  $k$  in the reaction  $j$ , and  $v_j$  is the velocity of the reaction  $j$ . The term  $\sum_j \nu_{j,k} \xi_j$  is a net sink (or source) term of  $n_k$  over all possible reactions where  $k$  is involved within the elemental volume. Note, that total mass is conserved, and the sink (or source) term of a component  $k$  implies that there is a source (or sink) in other components.

The energy balance equation for an elemental volume is given by:

$$\frac{de}{dt} + \nabla \cdot \mathbf{J}_e = 0 \quad (\text{S2})$$

where  $\mathbf{J}_e$  is the total flux of energy in the elemental volume. We consider three main components for  $\mathbf{J}_e$ : (i) a flux of kinetic energy  $\mathbf{J}_c$ , (i) a flux of energy that is directly related with the internal energy of the control volume  $\mathbf{J}_u$ , and (ii) a flux of energy in the form of radiation.

$$\mathbf{J}_e = \mathbf{J}_c + \mathbf{J}_u + \mathbf{J}_{rad}. \quad (\text{S3})$$

Under a gravitational field  $\mathbf{J}_c$  and  $\mathbf{J}_u$  can be expressed as:

$$\mathbf{J}_c = \sum_k \frac{1}{2} M_k v_k^2 \mathbf{I}_k \quad (\text{S4})$$

$$\mathbf{J}_u = \mathbf{J}_q + \sum_k \mathbf{I}_k \left( u_k + M_k g z \right) \quad (\text{S5})$$

where  $M_k$  is mass of component  $k$ ,  $u_k$  is the internal energy in component  $k$ ,  $z$  is the gravity, and  $g$  is the gravity.

## 1.2. Entropy Budget for Open Systems in Non Thermal Equilibrium

The entropy budget of an elemental volume is given by:

$$\frac{ds}{dt} + \nabla \cdot \mathbf{L}_s = \sigma \quad (\text{S6})$$

where  $\mathbf{L}_s$  is the flux of entropy, and  $\sigma$  is the entropy production in the elemental volume. Note that entropy is not conserved. In this document we divide  $\sigma$  in two:

$$\sigma = \sigma_{int} + \sigma_{rad}. \quad (\text{S7})$$

where  $\sigma_{int}$  refers to the production of entropy within the elemental volume associated with transformations of different forms of energy to heat, and  $\sigma_{rad}$  is the production of entropy associated with the dissipation of incoming fluxes of radiation in other forms of energy at the surface.

It can be shown that for an elemental volume experiencing a gravitational field, and receiving radiative fluxes of energy the flux of entropy  $\mathbf{L}_s$  is given by:

$$\mathbf{L}_s = \frac{\mathbf{J}_q}{T} + \sum_k s_k \frac{\mathbf{I}_k}{M_k} + \mathbf{L}_{rad} \quad (\text{S8})$$

where  $\mathbf{L}_{rad}$  is the flux of entropy associated with radiation fluxes, and  $s_k$  is the molar entropy associated with component  $k$  which is defined as:

$$s_k = \frac{u_k - \mu_k}{T} \quad (\text{S9})$$

where  $u_k$  is the molar internal energy in component  $k$  under the absence of a gravitational field, and  $\mu_k$  is the molar chemical potential associated with component  $k$ . Similarly, it can also be shown that the entropy production  $\sigma_{int}$  is given by:

$$\begin{aligned} \sigma_{int} = & \mathbf{J}_u \cdot \nabla \left( \frac{1}{T} \right) - \sum_k \frac{\mathbf{I}_k}{M_k} \cdot \nabla \left( \frac{\mu_k}{T} \right) + \sum_j \frac{A_j^f}{T} v_j \\ & - \sum_k \frac{\mathbf{I}_k}{T} \cdot \nabla (gz) + \frac{\delta \phi}{T} \end{aligned} \quad (\text{S10})$$

In this equation the term  $A_j^f$  is the affinity of the reaction  $j$ ,  $\phi$  is the dissipation rate of kinetic energy to heat in the elemental volume, and  $\mathbf{J}_u$  is the energy flux in the absence of a gravitational field.

$$\mathbf{J}_u = \mathbf{J}_q + \sum_k \frac{\mathbf{I}_k}{M_k} u_k \quad (\text{S11})$$

Equations (S7) and (S10) describe the production of entropy for an elemental volume exposed to fluxes of radiation and experiencing a gravitational field. Note that there are five terms on the right side of Equation (S10). Each of these terms refer to a particular process, (i) *heat transfer*; (ii) *diffusion*; (iii) *chemical reactions*; (iv) *loss of potential energy under a gravitational field*; and (iv) *dissipation of kinetic energy*.

### 1.3. Entropy Generation

If we integrate in space over the total volume of the open system and if we define some time scale  $\tau$  we can compute the total entropy generated ( $\dot{S}_{gen}$ ) in the system during these spatial and time scales as:

$$\dot{S}_{gen} = \int_0^\tau \int_V \frac{ds}{dt} dV dt + \int_0^\tau \int_V \nabla \cdot \mathbf{L} dV dt \geq 0 \quad (\text{S12})$$

By applying the divergence theorem it is possible to express  $\dot{S}_{gen}$  in terms of the fluxes across the control volume boundary.

$$\dot{S}_{gen} = \int_0^\tau \left( \frac{dS_{T,cz}}{dt} \right) dt + \int_0^\tau \int_{A_{cz}} \mathbf{L} \cdot \hat{n} dA dt \geq 0 \quad (\text{S13})$$

where  $dS_{T,cz}$  is the total instantaneous change of entropy in the control volume, and  $\hat{n}$  refers to the unit normal vector field to  $A_{cz}$ . Using Equation (S8) we can obtain the next expression for the  $\dot{S}_{gen}$ :

$$\dot{S}_{gen} = \int_0^\tau dS_{T,cz} + \int_0^\tau \int_{A_{cz}} \left( \frac{\mathbf{J}_q}{T} + \sum_k s_k \frac{\mathbf{I}_k}{M_k} + \mathbf{L}_{rad} \right) \cdot \hat{n} dA dt \geq 0 \quad (\text{S14})$$

### 1.4. Calculation of Entropy at Steady State

At steady state the rate of change of entropy at the elemental volume is negligible, thus from Equation (S6):

$$\nabla \cdot \mathbf{L} = \sigma. \quad (\text{S15})$$

In some situations the instantaneous change of entropy at elemental volumes within the system is not negligible ( $ds/dt \neq 0$ ), but over a period of time  $\tau$  the total change of entropy in the control volume could be considered negligible:

$$\int_0^\tau dS_{T,cz} \approx 0 \quad (\text{S16})$$

This particular scenario is useful in the Critical Zone (CZ) where the annual change of entropy could be considered low enough to be neglected. In this case the generation of entropy can be computed based on the fluxes of entropy across the surface only:

$$\dot{S}_{gen} = \int_0^\tau \int_{A_{cz}} \mathbf{L} \cdot \hat{n} dA dt \geq 0 \quad (\text{S17})$$

## 2. Derivation of $\sigma_{cz,int}$

This section shows the derivation for the internal production of entropy  $\sigma$  in the presence of the Earth's Gravitational Field for an elemental volume that experiences fluxes of mass and heat with the environment only, radiation is neglected. This derivation is based on [Kondepudi and Prigogine \[1\]](#) Chapter 15.

The rate of change in energy  $e$  for an elemental volume where local equilibrium is assumed can be stated as:

$$\frac{\partial e}{\partial t} = \frac{\partial u}{\partial t} + \frac{\partial c}{\partial t} \quad (\text{S18})$$

where  $u$  is the internal energy and  $c$  is the kinetic energy. The rate of change of energy is also given by:

$$\frac{\partial e}{\partial t} = -\nabla \cdot \mathbf{J}_e \quad (\text{S19})$$

where  $\mathbf{J}_e$  is the total flux of energy into the control volume:

$$\mathbf{J}_e = \mathbf{J}_q + \sum_k (u_k + c_k + M_k g z) \mathbf{I}_{Mk} \quad (\text{S20})$$

where  $\mathbf{J}_q$  is the heat flux, and  $u_k$  is the mean molar internal energy content in component  $k$ . Term  $c_k = 1/2 M_k v_k^2$  is the mean molar kinetic energy in component  $k$  where  $v_k$  is the mean velocity of component  $k$ . The balance of kinetic energy can be expressed as:

$$\frac{\partial c}{\partial t} = -\nabla \cdot \underbrace{\sum_k (c_k \mathbf{I}_{Mk})}_{\mathbf{J}_c} - \delta\phi \quad (\text{S21})$$

where  $\mathbf{I}_{Mk} = \mathbf{I}_k / M_k$  is the molar flux of component  $k$ , and  $\delta\phi$  is a sink term in this equation that reflects the dissipation of kinetic energy due to transformation to heat. We can use the previous expressions to compute the rate of change in  $u$  in the elemental volume as:

$$\frac{\partial u}{\partial t} = \frac{\partial e}{\partial t} - \frac{\partial c}{\partial t} = -\nabla \cdot \underbrace{\left( \mathbf{J}_q + \sum_k (u_k + M_k g z) \mathbf{I}_{Mk} \right)}_{\mathbf{J}_u^o} + \delta\phi \quad (\text{S22})$$

where  $\mathbf{J}_u^o$  is the flux related to  $u$  under the Earth's Gravitational Field.

The Gibbs relation is given as:

$$T ds = du - \sum_k \mu_k dn_k - \sum_k M_k g z dn_k. \quad (\text{S23})$$

Based on Equation (S23) the rate of change of entropy can be expressed as:

$$\frac{\partial s}{\partial t} = \frac{1}{T} \left( -\nabla \cdot \mathbf{J}_u^o + \delta\phi \right) + \sum_k \left( \frac{\mu_k + M_k g z}{T} \right) \left( \frac{\partial n_k}{\partial t} \right) \quad (\text{S24})$$

Note that:

$$\frac{\partial n_k}{\partial t} = -\nabla \cdot \mathbf{I}_{Mk} - \sum_j \nu_{j,k} v_j \quad (\text{S25})$$

where  $v_j$  is the velocity of a reaction  $j$  and  $\nu_{j,k}$  are the stoichiometric coefficients for component  $k$  in a reaction  $j$ . It can be shown from Equation (S24) that:

$$\frac{\partial s}{\partial t} + \nabla \cdot \left[ \frac{\mathbf{J}_u^o}{T} - \sum_k \left( \frac{\mu_k + M_k g z}{T} \right) \mathbf{I}_{Mk} \right] = \mathbf{J}_u^o \cdot \nabla \left( \frac{1}{T} \right) - \sum_k \mathbf{I}_{Mk} \cdot \nabla \left[ \frac{\mu_k + M_k g z}{T} \right] + \sum_j \frac{A_j^f v_j}{T} + \delta\phi \quad (\text{S26})$$

where  $A_j^f$  is the affinity of the chemical reaction  $j$ . We can define a flux  $\mathbf{J}_u$  that does not include the fluxes related to a gravitational field:

$$\mathbf{J}_u^o = \underbrace{\mathbf{J}_q + \sum_k u_k \mathbf{I}_{Mk}}_{\mathbf{J}_u} + \sum_k M_k \mathbf{I}_{Mk} \quad (\text{S27})$$

also note that:

$$\sum_k \mathbf{I}_{Mk} \cdot \nabla \left( \frac{M_k g z}{T} \right) = \sum_k \frac{\mathbf{I}_{Mk} M_k g}{T} \nabla z + \sum_k I_{Mk} M_k g z \cdot \nabla \left( \frac{1}{T} \right) \quad (\text{S28})$$

Using Equations (S27) and (S28) we can express Equation (S26) as:

$$\begin{aligned} \frac{\partial s}{\partial t} + \nabla \cdot \left[ \frac{\mathbf{J}_q}{T} - \sum_k \left( \frac{s_k}{T} \right) \mathbf{I}_{Mk} \right] = \\ \left( \mathbf{J}_q + \sum_k u_k \frac{\mathbf{I}_k}{M_k} \right) \cdot \nabla \left( \frac{1}{T} \right) - \sum_k \frac{\mathbf{I}_k}{M_k} \cdot \nabla \left( \frac{\mu_k}{T} \right) + \sum_j \frac{A_j^f v_j}{T} + \sum_k \frac{\mathbf{I}_k}{T} g \cdot \nabla(z) + \frac{\delta \phi}{T} \end{aligned} \quad (\text{S29})$$

where  $s_k$  is the molar entropy content of component  $k$ . Comparing Equation (S26) with the entropy budget of the local control volume experiencing a flux of entropy  $\mathbf{L}$  associated with heat and mass fluxes only:

$$\frac{\partial s}{\partial t} + \nabla \cdot \mathbf{L} = \sigma_{prod} \quad (\text{S30})$$

We observe that the term to the right in Equation (S29) represents the entropy production within the local domain.

$$\begin{aligned} \sigma_{prod} = & \underbrace{\left( \mathbf{J}_q + \sum_k u_k \frac{\mathbf{I}_k}{M_k} \right) \cdot \nabla \frac{1}{T}}_{\text{Heat Flux}} - \underbrace{\sum_k \frac{\mathbf{I}_k}{M_k} \cdot \nabla \frac{\mu_k}{T}}_{\text{Diffusion}} + \underbrace{\sum_i \frac{A_i^f v_i}{T}}_{\text{Chemical Reactions}} \\ & - \underbrace{\sum_k \frac{\mathbf{I}_k}{T} g \cdot \nabla(z)}_{\text{Potential Energy Transformation}} + \underbrace{\frac{\delta \phi}{T}}_{\text{Kinetic Energy Transformation}}. \end{aligned} \quad (\text{S31})$$

### 3. Thermodynamic Entropy of Radiation

Radiation is an main form of heat transfer. A proper understanding and computation of the entropy associated with radiation is needed to have a complete quantification of the entropy budget in the CZ. In this document we show the most important equations. For more details see [Wu and Liu \[10\]](#).

With the introduction of the quantum hypothesis Max Planck was able to obtain an expression for the energy ( $J_\nu$ ), and entropy ( $L_\nu$ ) fluxes of a blackbody radiation beam at a particular frequency  $\nu$ :

$$J_\nu = \frac{h\nu^3}{c^2} \left( \frac{1}{\exp(\frac{h\nu}{\kappa T}) - 1} \right), \quad (\text{S32})$$

$$L_\nu = \frac{h\nu^2}{c^2} \left\{ \left( 1 + \frac{c^2 J_\nu}{h\nu^3} \right) \ln \left( 1 + \frac{c^2 J_\nu}{h\nu^3} \right) - \left( \frac{c^2 J_\nu}{h\nu^3} \right) \ln \left( 1 + \frac{c^2 J_\nu}{h\nu^3} \right) \right\}. \quad (\text{S33})$$

In these equations,  $c$  is the speed of light,  $h$  is the Planck constant, and  $\kappa$  is the Boltzmann constant. The radiation entropy  $\mathbf{L}_{rad}$  flux emitted from a blackbody over a surface can be obtained through integration over the solid angle, and frequencies:

$$\mathbf{L}_{rad} = \int_o^\infty \int_\Omega L_\nu \cos\theta d\Omega d\nu, \quad (\text{S34})$$

where  $\theta$  is the zenith angle. It can be shown that;

$$\mathbf{J}_{rad} = \sigma_b T_{source}^4, \quad (\text{S35})$$

and

$$\mathbf{L}_{rad} = RF \sigma_b T_{source}^3 = RF \frac{\mathbf{J}_{rad}}{T_{source}}. \quad (\text{S36})$$

where  $T_{source}$  is the temperature of the body emitting the radiation,  $\sigma_b$  is the Stefan-Boltzmann constant which has been obtained both experimentally and theoretically. It can be shown that [10]:

$$\sigma_b = \frac{2\pi^5 \kappa^4}{15c^2 h^3}. \quad (\text{S37})$$

Term  $RF$  in Equation (S36) is the radiation factor (usually  $RF > 1$ ). Note that the  $RF$  differentiates the formulation for the computation of entropy in radiation and heat fluxes. The value of  $RF$  for blackbody radiation is  $4/3$ . However non-blackbody radiation is ubiquitous on Earth. In order to quantify the energy and entropy fluxes of non-blackbody radiation [Petela \[11\]](#) introduced the concept of a perfect gray body that behaves as a blackbody but the spectral radiation energy flux is equal to the Planck function for blackbody radiation affected by an emissivity  $\varepsilon$ . Assuming that  $\varepsilon$  is frequency independent it is possible to show that the energy flux of non-blackbody radiation is  $\mathbf{J}_{rad} = \varepsilon \sigma T^4$ . However, the same does not hold for the entropy flux. In other words, even under the assumption that  $\varepsilon$  is frequency independent the entropy flux of non-blackbody radiation  $\mathbf{L}_{rad} \neq \frac{4}{3} \varepsilon \sigma_b T^3$ . In order to compute the entropy flux of a non-blackbody radiation we must integrate  $L_\nu(\varepsilon)$  over the solid angles and frequencies  $\nu$ :

$$\mathbf{L}_{rad} = \int_o^\infty \int_\Omega L_\nu(\varepsilon) \cos\theta d\Omega d\nu. \quad (\text{S38})$$

However, this integration is challenging as  $L_\nu(\varepsilon)$  is non-linear. [Landsberg and Tonge \[12\]](#) developed an approximate solution of Equation (S38) by considering a diluted blackbody radiation with a dilution factor  $\delta$ , which can be considered analogous to the emissivity  $\varepsilon$ . This approximation has shown good results except for low values of  $\varepsilon$ . A more recent approximation developed by [Wright et al. \[13\]](#) using a similar approach as [Landsberg and Tonge \[12\]](#) was able to overcome this problem, and has shown good accuracy in the solution of Equation (S38). Both [Landsberg and Tonge \[12\]](#) and [Wright et al. \[13\]](#) formulations have been very helpful to quantify the fluxes of entropy of radiation in processes related to the CZ.

## 4. Description of Optimum Principles

### 4.1. Minimum Work (or Energy) Rate Expenditure

An initial optimum hypothesis based on minimum work was suggested by Murray [22,23] for physiological systems. In this case *work* was related with a cost of operation that could be associated with system maintenance. In the CZ a first approach related with work was performed by Leopold and Langbein [24] that proposed the principle of least work for streams. According to Leopold and Langbein [24] this principle is compatible with the principle of minimum entropy production. Although the study by Leopold and Langbein [24] was criticized for its lack of formalism in the application of thermodynamic concepts, it established the foundation of a new paradigm to analyze the geomorphological evolution of the CZ. Different principles based on minimum work, energy, or power were postulated to understand the landscape evolution. These principles were able to capture the patterns observed in meanders, the formation of riffles and pools, and the formation of self-similar river networks [25]. There has been a long debate about the validity of these principles and their application in fluvial geomorphology. Today, the debate still continues and the validation with experimental information and models is not definitive.

The connection between these minimum principles with other principles associated with thermodynamic entropy that have been applied in the CZ is still unclear. An interesting analogy was performed by Molnar and Ramirez [26] with the implementation of the Gyarmati principle to analyze the flow in open channels. The Gyarmati principle proposed the maximization of a function  $G_y$  defined as:

$$G_y = \left( \int_V (\sigma - \psi) dV \right) \quad (\text{S39})$$

where  $\sigma$  is the local entropy production and  $\psi$  is the local dissipation potential rate. Note that function  $G_y$  involves a space integration of the entropy production and therefore this principle is not equivalent with the maximum entropy production principle (MEPP) because MEPP is a local based principle. Molnar and Ramirez [26] were able to show an equivalence between the Gyarmati principle and the minimum energy dissipation rate principle under some special conditions of river flow.

### 4.2. Minimum Entropy Production Principle, MinENT

The minimum entropy production principle MinENT was postulated by Prigogine [27]. According to Prigogine [27] systems in the linear non-equilibrium regime reach a steady state ( $\frac{dS}{dt} = 0$ ) at which the entropy production from the system ( $\int_V \sigma dV$ ) is constant and attains a minimum value [1]. Note that the objective function in this principle refers to the total production of entropy that involves a space integration of the local entropy production  $\sigma$ . This principle can be applied only for the linear regime and provides information only at the stationary state. In recent years this principle has been criticized mainly because it does not provide sufficient further insight about the system beyond to what is already known from balances of mass, momentum, and energy [28,29].

#### 4.3. Maximum Power Output Principle, MPOP

The maximum power output principle MPOP was initially proposed by Odum and Pinkerton [30]. They suggested that systems tend to maximize the power output. As explained in Odum and Pinkerton [30], the power output in this principle refers to the definition of power implemented in thermodynamics which is the rate of energy transfer by work, or useful energy. According to this principle, systems tend to use useful available energy, become more efficient, and therefore maximize the power output. According to this hypothesis in order to maximize power there has to be a trade off between the efficiency (useful work produced) and rate. Processes with high efficiency occurs very slow, while fast processes end up producing less useful work and destroying free energy in the form of heat. The maximum power output would occur at an intermediate point between these two conditions. Hall [31] introduces interesting examples in biochemistry, economy, car engines, and coal burning where this principle occurs. From a human perspective this principle would be a condition that any ideal system would pursue. For instance, the goal of human made systems is usually to maximize work per unit of time. Although this principle is very logical, the main question is whether nature is designed with this objective? Additionally, the computation of actual power for a system such as the CZ is challenging and could become arbitrary at some point. Power output is a quantity that is difficult to quantify as it goes beyond the second law of thermodynamics [32]. Concepts such as exergy provides a limit about the potential work that can be extracted instead of the actual work that is performed by the system. Some approaches have used a similar formulation as exergy to calculate the limits of maximum work that can be extracted from a flux of exergy for different processes of the CZ [33,34].

The MPOP was reformulated by Odum [35] in terms of maximizing emergy. According with Odum [35] more power output could be stated in terms of a maximization of emergy. The principle was restated again by Odum [36] in terms of maximization of empower, and was proposed by Odum as the fourth law of energetics. There is no decisive evidence of the maximum power principle [37]. However, its supporters argue it is challenging to test this principle and it could take some time similarly as it has taken with previous ecological hypotheses including Darwin's natural selection [31]. However, there is some indirect evidence that nature choose intermediate states in efficiency and rate, at which power attains a maximum. One example of intermediate states is the leaf area index of deciduous forest which is maintained at an intermediate state where it produces a maximum power.

#### 4.4. Maximum Entropy Production Principle MEPP

Open systems in a state that is far away from equilibrium experience a continuous production of entropy sustained by a constant incoming flux of energy with low thermodynamic entropy from the environment. This production of entropy allows these systems to maintain the structure and organization, and increase the amount of information. Therefore, it is likely that if there is an optimum function pursued by open systems as they move away from equilibrium, it will be associated with thermodynamic entropy. However, the question is whether these systems maximize thermodynamic entropy? On the one hand some authors suggest that open systems optimize rather than maximize entropy production [38]. On the other hand some authors support the maximum entropy principle (MEPP) that suggest there is a maximization at a local scale in these systems as the move away from equilibrium.

The MEPP was initially proposed by Ziegler [39,40]. According to this principle when thermodynamic forces ( $F_i^T$ ) are preset, the fluxes are such that maximize the entropy production density at the local scale  $\sigma(J_i^T)$  [28]. This principle seems a promising fundamental alternative that determines the behavior of open systems in far from equilibrium conditions. There are some experimental examples that support this hypothesis (See Manuscript). The optimization problem to find  $J_j^T$  can be stated as:

$$\begin{aligned} &\text{maximize:} && \sigma(J_i^T) \\ &\text{subject to:} && \sigma(J_i^T) = \sum_i F_i^T J_i^T. \end{aligned} \quad (\text{S40})$$

and can be solved with the next lagrangian function [29]:

$$La = \sigma(J_k) - \lambda \left( \sigma(J_k^T) - \sum_i F_i^T J_i^T \right) \quad (\text{S41})$$

where  $\lambda$  is a Lagrange multiplier. The thermodynamic fluxes  $J_k^T$  that maximize  $\sigma$  can therefore be determined by  $\frac{\partial La}{\partial J_j^T} = 0$ . As Martyushev [29] pointed the relationship between thermodynamic forces and fluxes may be both linear and nonlinear. This feature makes this principle very powerful. In addition, the principle holds for non-stationary state conditions, and it is possible to derivate MinENT from Equations (S40) and (S41) by implementing appropriate conditions [29].

Note that the objective function and the principle itself is conceptualized at a local domain. The entropy production from the total system by integration of the local entropy production may not be maximum. According to Martyushev [29] previous studies have erroneously refuted the principle by performing calculations of entropy production over the entire system through spatial integrations. However, several studies have also provided support for the principle from computations of total entropy over the entire system. Therefore, implementations linking this principle with the total entropy production from a system that is computed from a space integration of the local entropy production is not appropriate. In particular, it is important to keep in mind the local formulation of MEPP in the CZ where most of the applications are performed over large control volumes. However, the local formulation can be very useful to infer general properties of the system at local scales and then use these properties to analyze the system at larger scales.

Production of entropy involving larger spatial and time scales are more linked with the Entropy Generation Maximum Principle (EGMa) proposed by Lucia [41]. This principle deals with the generation of entropy and represent an interesting alternative that is more feasible to be tested.

#### 4.5. Principle of Maximum Exergy Storage, PMES

This principle was originally proposed by Jørgensen and Mejer [42–44] and has been analyzed in latter publications [45,46]. A continuous flux of exergy is responsible for driving a system towards a state that is far from thermodynamic equilibrium. Therefore, it is very likely that exergy is an important variable that controls the evolution of open systems in a state that is far from equilibrium. According to this hypothesis the most probable path that a system exposed to exergy fluxes will take as it moves far and far from equilibrium is that in which it maximizes the storage of exergy. In the case of ecological systems

eco-exergy is used instead of exergy. This principle has been tested on several ecological systems [47–49] and seems a good goal that guide the development of ecosystems. Analysis of exergy storage captures the 24 properties of ecosystem maturity proposed by Odum [50] as indicators of maturity [51]. Although the goal of this principle is related to a “storage” of exergy, this may result in similar patterns as those obtained if maximum power is maximized, since maximization of exergy storage could enhance the generation of power [52]. However, exergy only poses a maximum limit on the availability of useful energy. Therefore, maximization of exergy storage will provide only an alternative where the system becomes effective in maximizing the storage of potential useful energy that can be used to perform work. It does not assure that the system is maximizing the work that is produced because exergy could be destroyed in different ways including some where no work is produced. Therefore, PMES and MPOP are different hypotheses and it needs to be proven that both leads to the same patterns in all conditions.

#### 4.6. Principle of Maximum Exergy Dissipation, PMED

This principle was originally proposed by Schneider and Kay [53,54] and implies that as open thermodynamic systems are moved away from equilibrium due to external fluxes of exergy, these systems will respond by organizing themselves and degrading exergy as much as possible. In addition, as the systems are moved further away from equilibrium they will enhance more the organization patterns and become more effective to degrade exergy. Degradation of exergy is connected with generation of entropy. Therefore, this principle is similar with a maximum generation of entropy (EGMa) Lucia [41]. Similarly to PMES a main motivation in the conceptualization of this principle is the connection of exergy with useful energy and work. However, as mentioned above exergy only poses a limit on the availability of useful energy to perform work. Therefore, dissipation of exergy not necessarily means maximization of work per unit time.

#### 4.7. Principle of Maximum Energy Flow

In his seminal paper *Contribution to the Energetics of Evolution*, Alfred Lotka suggested that natural selection and therefore evolution tends to maximize the energy flux through the system in accordance with the constraints that are imposed. This paper represented an important contribution to the energetics of ecology and even today, the implications of this study are still under consideration. There have been some attempts to connect Lotka’s principle with others that are more recent. However, as explained below this connection could be analyzed from different angles that may be adjusted accordingly with different principles.

Lotka states that the units of the objective that he proposed to maximize are *power*. Therefore, it has been suggested that this principle is connected with the MPOP. However, it can be arguable what exactly Lotka meant when he used the word *energy*. It seemed that energy as used in his paper refers to a form of useful energy to perform work and therefore could be associated with exergy. Also, according to Lotka if other things are equal the energy flux will be proportional to the mass in the system. This mass is referred in his paper as organic matter and therefore his objective of energy flux will result similar to maximizing eco-exergy storage as proposed in PMES [37]. However, there are some constraints on mass production based on available resources. According to Lotka under such constraints there will be a maximum power

from the turnover of available organic matter. In this case the turnover of organic matter (eco-exergy) could be associated with exergy dissipation by the system as suggested by the PMED.

#### 4.8. Principle of Maximum Entropy POME

This principle was initially proposed by Jaynes [55,56]. According to this principle when making inferences from data that is incomplete the probability distribution that should be selected is the one that satisfies the maximum information entropy subject to given constraints. This principle is motivated on the fact that distributions with higher entropy are more probable. The optimization problem can be stated as [14]:

$$\begin{aligned} \text{maximize:} \quad & H(X) \\ \text{subject to:} \quad & \int_a^b f(x)dx = 1 \\ & \int_a^b g_r(x)f(x)dx = \overline{g_r(x)} \end{aligned} \quad (\text{S42})$$

where the first constraint results from the definition of a probability density function, and the other constraints are given by particular properties of the system under consideration and are defined in terms of moments. According with Singh and Rajagopal [14,57] this maximization problem can be solved with Lagrange multipliers with the next lagrangian function

$$\begin{aligned} La = & - \int_a^b f(x) \ln(f(x))dx - (\lambda_0 - 1) \left( \int_a^b f(x)dx - C_0 \right) \\ & - \sum_{r=1}^n \lambda_r \left( \int_a^b f(x)g_r(x)dx - C_r \right). \end{aligned} \quad (\text{S43})$$

In this equation,  $\lambda_r$  refers to the lagrange multiplier that is used for constraint  $r$ . The function  $f(x)$  that satisfies the maximum  $H(X)$  can then be obtained from  $\frac{\partial La}{\partial f} = 0$ . This principle has been widely used in hydrology to infer the probabilistic distribution of different variables. However, it has not been used as a predictive principle that guides the evolution of open systems that are far from equilibrium. Dewar [58,59] tried to link this principle with MEPP but his approach has been criticized by Bruers [29,60].

#### 4.9. Principle of Maximum Ascendency

Ascendency is defined for networks as the product of total system throughput and average mutual information ( $As = IT$ ). Ascendency has been correlated with the 24 properties proposed by [50] as indicators of maturity. Based on this evidence Ulanowicz [61,62] proposed a principle that will help to understand ecosystem development. According to this principle, in the absence of major perturbations, ecosystems will exhibit a tendency to increase in ascendency [63]. This principle is particularly important because it is directly associated with the network organization of the ecosystem which is a major property that in some cases is underestimated. In addition, this is the only optimum principle from

all those described in this study where a concept directly linked with information entropy is included to conceptualize the development of ecosystems.

## 5. Multi-Objective Optimization

A multi-objective optimization problem can be stated as [64]:

$$\begin{aligned} &\text{maximize:} && \zeta(\mathbf{x}) \\ &\text{subject to:} && g_i(\mathbf{x}) \leq 0 \\ &&& h_i(\mathbf{x}) \leq 0 \end{aligned} \tag{S44}$$

where  $\zeta(\mathbf{x}) = (\zeta_1(\mathbf{x}), \zeta_2(\mathbf{x}), \zeta_3(\mathbf{x}), \dots, \zeta_n(\mathbf{x}),)$  is a vector of optimum functions defined over a  $n$ -dimensional decision variable vector  $\mathbf{x} = (x_1, x_2, x_3, \dots, x_n)$ , and  $g_i(\mathbf{x}), h_j(\mathbf{x}), i = \{1, \dots, m\} j = \{1, \dots, p\}$ , represents all the constraints that must be fulfilled. The solution of this optimization problem is a Pareto front, that represents a trade off between all the objective functions that are considered. It represents the optimum points that are attained for an objective in such a way that it can not be optimized more without degrading some other objective values.

## List of Symbols

| Symbol                    | Description                                                 |
|---------------------------|-------------------------------------------------------------|
| SW                        | Shortwave                                                   |
| LW                        | Longwave                                                    |
| LE                        | Latent heat                                                 |
| HH                        | Sensible eat                                                |
| <b>I</b>                  | Flux of mass                                                |
| <b>J</b>                  | Flux of energy                                              |
| <b>L</b>                  | Flux of entropy                                             |
| <b>L<sub>rad</sub></b>    | Flux of entropy in the form of radiation                    |
| <i>S</i>                  | Thermodynamic entropy                                       |
| <i>W</i>                  | Work as defined in thermodynamics                           |
| <i>G</i>                  | Free Energy                                                 |
| <i>H</i>                  | Information (Shannon) entropy                               |
| <i>T</i>                  | Temperature                                                 |
| <i>g</i>                  | Gravitational field                                         |
| <b>V<sub>cz</sub></b>     | Control Volume to delineate the Critical Zone               |
| <i>A<sub>cz</sub></i>     | Surface area of the control volume in <i>V<sub>cz</sub></i> |
| <i>M<sub>T, cz</sub></i>  | Total Mass in the CZ defined by <i>V<sub>cz</sub></i>       |
| <i>E<sub>T, cz</sub></i>  | Total Energy in the CZ defined by <i>V<sub>cz</sub></i>     |
| <i>S<sub>T, cz</sub></i>  | Total Entropy in the CZ defined by <i>V<sub>cz</sub></i>    |
| <i>E<sub>ex, cz</sub></i> | Total Exergy in the CZ defined by <i>V<sub>cz</sub></i>     |

| Symbol                 | Description                                                                                                      |
|------------------------|------------------------------------------------------------------------------------------------------------------|
| $m_{cz}$               | Local mass in Critical Zone                                                                                      |
| $e_{cz}$               | Energy of an elemental volume within the Critical Zone                                                           |
| $s_{cz}$               | Entropy of an elemental volume within Critical Zone                                                              |
| $M_k$                  | Molar mass in component $k$                                                                                      |
| $\sigma_{cz}$          | Entropy production by the control volume $V_{cz}$                                                                |
| $\sigma_{cz,rad}$      | Local entropy production associated with a transformation of radiation                                           |
| $\sigma_{cz,int}$      | Local entropy production associated with the production of entropy from internal processes within the $V_{cz}$ . |
| $\dot{S}_{gen,cz}$     | Entropy generated by the CZ                                                                                      |
| $\dot{S}_{gen,cz,rad}$ | Entropy generated by the CZ associated with instantaneous transformation of radiation at the surface             |
| $\dot{S}_{gen,cz,int}$ | Entropy generated by the CZ associated with internal processes within the CZ.                                    |
| $\Gamma_{gen,cz}$      | Destruction of exergy by the CZ                                                                                  |
| $\Gamma_{gen,cz,rad}$  | Destruction of exergy by the CZ associated with instantaneous transformation of radiation at the surface         |
| $\Gamma_{gen,cz,int}$  | Destruction of exergy by the CZ associated with with internal processes within the CZ.                           |
| $\tau$                 | Time scale associated with a particular process used to compute $\dot{S}_{gen,cz}$ .                             |
| $\mu_k$                | Chemical potential in component $k$                                                                              |
| $n_k$                  | Mole number per unit volume of component $k$                                                                     |
| $s_k$                  | Molar entropy in component $k$                                                                                   |
| $u_k$                  | Internal energy in component $k$                                                                                 |
| $c_k$                  | Average kinetic energy associated with component $k$                                                             |
| $h_k$                  | Enthalpy associated with component $k$                                                                           |
| $A_i^f$                | Affinity of a chemical reaction                                                                                  |
| $v_i$                  | Velocity of a chemical reaction                                                                                  |
| $\nu_{j,k}$            | Stoichiometric coefficients of component $k$ in reaction $j$                                                     |
| $\delta\phi$           | Amount of kinetic energy transformed to heat                                                                     |
| $RF$                   | Radiation factor for computation of thermodynamic entropy of radiation                                           |
| $I_{PPT}$              | Mass flux associated with precipitation                                                                          |
| $I_{ET}$               | Mass flux associated with evapotraspiration                                                                      |
| $I_{ELV}$              | Mass flux associated with physical denudation                                                                    |
| $I_{GEO}$              | Mass flux associated with chemical denudation                                                                    |
| $J_{SW}$               | Energy flux associated with shortwave radiation                                                                  |
| $J_{LW}$               | Energy flux associated with longwave radiation                                                                   |
| $J_{Q,LE}$             | Energy flux associated with latent heat                                                                          |
| $J_{Q,H}$              | Energy flux associated with sensible heat                                                                        |
| $J_{ELV}$              | Energy flux associated with physical denudation                                                                  |
| $J_{GEO}$              | Energy flux associated with chemical denudation                                                                  |
| $J_{Q,G}$              | Ground heat flux                                                                                                 |

| Symbol              | Description                                                                                                           |
|---------------------|-----------------------------------------------------------------------------------------------------------------------|
| $J_{Q,atm}$         | Flux associated with the heat absorbed by the atmospheric part of the critical zone.                                  |
| $J_{bio}$           | Energy flux associated with living systems in CZ.                                                                     |
| $J_{pho}$           | Energy flux associated with SW taken during photosynthesis.                                                           |
| $J_{Q,resp}$        | Energy flux within the CZ associated with heat fluxes from respiration and dissipation of work of biological systems. |
| $J_{Q,H_2O}$        | Energy flux within the CZ associated with heat fluxes from dissipation of kinetic and potential energy of water.      |
| $J_{H_2O}$          | Net energy flux associated with water fluxes.                                                                         |
| $L_{SW}$            | Entropy flux associated with SW radiation                                                                             |
| $L_{LW}$            | Entropy flux associated with LW radiation                                                                             |
| $L_{Q,LE}$          | Entropy flux associated with LE heat                                                                                  |
| $L_{Q,H}$           | Entropy flux associated with HH heat                                                                                  |
| $L_{ELV}$           | Entropy flux associated with physical denudation                                                                      |
| $L_{GEO}$           | Entropy flux associated with chemical denudation                                                                      |
| $L_{Q,G}$           | Ground heat flux                                                                                                      |
| $L_{Q,atm}$         | Entropy flux associated with heat absorbed by the atmospheric part of the critical zone.                              |
| $L_{bio}$           | Entropy flux associated with living systems in CZ.                                                                    |
| $L_{pho}$           | Entropy flux associated with SW taken during photosynthesis.                                                          |
| $L_{Q,resp}$        | Entropy flux associated with heat fluxes from respiration and dissipation of work of biological systems.              |
| $L_{Q,H_2O}$        | Entropy flux associated with heat fluxes from dissipation of kinetic and potential energy of water.                   |
| $L_{H_2O}$          | Net entropy flux associated with water fluxes.                                                                        |
| $R_n$               | Net radiation                                                                                                         |
| $L_G$               | Entropy flux related to the ground heat flux                                                                          |
| $L_{SW}$            | Entropy flux related to shortwave radiation flux                                                                      |
| $s_{solar}$         | Solar constant of first order                                                                                         |
| $e_{solar}$         | Solar constant of second order                                                                                        |
| $\sigma_{evap}$     | Solar evaporation                                                                                                     |
| $\dot{S}_{gen,atm}$ | Entropy generated by a control volume in the atmosphere defined by $V_{atm}$                                          |
| $\rho_{water}$      | Water density                                                                                                         |
| $RHa$               | Relative humidity of air at temperature $T_a$                                                                         |
| $RHs$               | Relative humidity of air at saturation at $T_a$                                                                       |
| $R_v$               | Gas constant for water vapor                                                                                          |
| $g$                 | Earth's Gravity                                                                                                       |
| $R$                 | Gas constant                                                                                                          |
| $F_s$               | Variable that includes the free energy of the entire soil after scaling up from minerals.                             |

| Symbol               | Description                                                                                         |
|----------------------|-----------------------------------------------------------------------------------------------------|
| $S_s$                | Variable that includes the thermodynamic entropy of the entire soil after scaling up from minerals. |
| $\Delta F$           | Change in the free energy of the entire soil.                                                       |
| $\Delta S_s$         | Change in the thermodynamic entropy of the entire soil.                                             |
| $E_{ex,CMI_{net}}$   | Net Exergy flux through the Critical Zone. It does not include exergy destruction                   |
| $\mu_{i,o}$          | Chemical potential of a given component (or mineral) at a given reference.                          |
| $Ec x$               | Ecoexergy.                                                                                          |
| $E_{sc x}$           | Specific Ecoexergy.                                                                                 |
| $c_i$                | Concentration of component $i$ .                                                                    |
| $\dot{Q}_{perc}$     | Rate of heat produced through percolation                                                           |
| $\dot{Q}_{surf}$     | Rate of heat produced through surface water flow                                                    |
| $T_s$                | Soil temperature                                                                                    |
| $T_{surf}$           | Temperature surface water                                                                           |
| $T_{source}$         | Temperature of body emitting radiation                                                              |
| $T_o$                | Temperature of hypothetical environment that surrounds the CZ                                       |
| $\sigma_{soil\_per}$ | Entropy production associated with the percolation of water in soils.                               |
| $\zeta_{str}$        | Discharge                                                                                           |
| $f(x)$               | Probabilistic density function of random variable $X$                                               |
| $p(x_i)$             | Probability of occurrence of event $x_i$                                                            |
| $p(x_i, y_j)$        | Probability of occurrence of event $x_i$ and $y_j$                                                  |
| $H(X)$               | Information (Shannon) Entropy of a random variable $X$                                              |
| $H(X, Y)$            | Join information entropy of random variables $X$ and $Y$                                            |
| $I(X, Y)$            | Mutual Information of variables $X$ and $Y$                                                         |
| $D_{KL}(p  q)$       | Kullback – Leibler divergence between distribution $p$ and $q$                                      |
| $\Phi_n$             | Non symmetric overhead in ecological networks                                                       |
| $\Phi_s$             | Symmetric overhead in ecological networks                                                           |
| $CMI$                | Conditional Mutual Information                                                                      |
| $DIT$                | Directional information transfer                                                                    |
| $TE$                 | Transfer Entropy                                                                                    |
| $F$                  | Total system throughput                                                                             |
| $F(i, j)$            | Quantum flux leaving compartment $i$ and entering compartment $j$                                   |
| $F(i)$               | Quantum flux leaving compartment $i$                                                                |
| $F(j)$               | Quantum flux entering compartment $j$                                                               |
| $B$                  | Total system mass                                                                                   |
| $B_i$                | Mass in system compartment $i$                                                                      |
| $B_j$                | Mass in system compartment $j$                                                                      |
| $D$                  | Dependency                                                                                          |
| $Rel$                | Relevance                                                                                           |
| $Red$                | Redundancy                                                                                          |

| Symbol     | Description                                        |
|------------|----------------------------------------------------|
| $\Omega$   | Number of possible arrangements of the microstates |
| $J^T$      | Thermodynamic flux                                 |
| $F^T$      | Thermodynamic force                                |
| $\lambda$  | Lagrange multipliers                               |
| $La$       | Lagrangian functions                               |
| $\sigma_b$ | Stefan-Boltzmann Constant                          |

## Conflicts of Interest

The authors declare no conflicts of interest.

## References

1. Kondepudi, D.; Prigogine, I. *Modern Thermodynamics: From Heat Engines to Dissipative Structures*, John Wiley & Sons Ltd: Baffins Lane, Chichester, UK, 1998.
2. Bendoricchio, G.; Jorgensen, S.E. Exergy as goal function of ecosystems dynamic. *Ecol. Model.* **1997**, *102*, 5–15.
3. Rasmussen, C.; Troch, P.A.; Chorover, J.; Brooks, P.; Pelletier, J.; Huxman, T.E. An open system framework for integrating critical zone structure and function. *Biogeochemistry* **2011**, *102*, 15–29.
4. Shannon, C.E. The mathematical theory of communication (Reprinted). *Bell Syst. Tech. J.* **1948**, *14*, 306–317.
5. Chapman, T.G. Entropy as a measure of hydrologic data uncertainty and model performance. *J. Hydrol.* **1986**, *85*, 111–126.
6. Thomas, M.; Thomas, J.A. Entropy, Relative Entropy and Mutual Information. In *Elements of Information Theory*; John Wiley & Sons: New York, NY, USA, 1991;
7. Kullback, S.; Leibler, R. On Information and Sufficiency. *Ann. Math. Stat.* **1951**, *22*, 79–86.
8. Schreiber, T. Measuring Information Transfer. *Phys. Rev. Lett.* **2000**, *85*, 461–464.
9. Ruddell, B.L.; Kumar, P. Ecohydrologic process networks: 1. Identification. *Water Resour. Res.* **2009**, *45*, W03419.
10. Wu, W.; Liu, Y. Radiation entropy flux and entropy production of the earth systems. *Rev. Geophys.* **2010**, *48*, 1–27, doi:10.1029/2008RG000275.
11. Petela, R. Exergy of Heat Radiation. *J. Heat Transf.* **1964**, *86*, 187–192.
12. Landsberg, P.T.; Tonge, G. Thermodynamics of the conversion of diluted radiation. *J. Phys. A: Math. Gen.* **1979**, *12*, 551–562.
13. Wright, S.E.; Scott, D.S.; Haddow, J.B.; Rosen, M.A. On the entropy of radiative heat transfer in engineering thermodynamics. *Int. J. Eng. Sci.* **2001**, *39*, 1691–1706.
14. Singh, V. Hydrologic Synthesis Using Entropy Theory: Review. *J. Hydrol. Eng.* **2011**, *16*, 421–433.
15. Amorocho, J.; Espildora, B. Entropy in Assessment of uncertainty in hydrologic systems and models. *Water Resour. Res.* **1973**, *9*, 1511–1522.

16. Sharma, A. Seasonal to interannual rainfall probabilistic forecasts for improved water supply management: Part 1—A strategy for system predictor identification. *J. Hydrol.* **2000**, *239*, 232–239.
17. Sharma, A.; Mehrotra, R. An information theoretic alternative to model a natural system using observational information alone. *Water Resour. Res.* **2014**, *50*, 650–660.
18. Peng, H.; Long, F.; Ding, C. Feature selection based on mutual information: Criteria of max-dependency, max-relevance, and min-redundancy. *IEEE Trans. Patterns Anal. Mach. Learn. Intell.* **2005**, *27*, 1226–1238.
19. Hejazi, M.I.; Cai, X. Input variable selection for water resources systems using a modified minimum redundancy maximum relevance (mMRMR) algorithm. *Adv. Water Resour.* **2009**, *32*, 582–593.
20. Stokelj, T.; Paravan, D.; Golob, R. Enhanced Artificial Neural Network Inflow Forecasting Algorithm for Run-of-River Hydropower Plants. *J. Water Resour. Plan. Manag.* **2002**, *128*, 415–423.
21. Ding, C.; Peng, H. Minimum Redundancy Feature Selection from Microarray Gene Expression Data. In 2nd Proceedings IEEE International Comput. Syst. Bioinform. Conf. Stanford, USA, August 2003.
22. Murray, C.D. The physiological principle of minimum work I The vascular system and the cost of blood volume. *Proc. Natl. Acad. Sci. USA* **1926**, *12*, 207–214.
23. Murray, C.D. The physiological principle of minimum work II Oxygen exchange in capillaries. In *Proc. Natl. Acad. Sci. USA* **1926**, *12*, 299–304.
24. Leopold, L.; Langbein, W. The Concept of Entropy in Landscape Evolution. *Theor. Pap. Hydrol. Geomorphol. Sci.* **1962**, *500* A,p. A1–A20.
25. Paik, K.; Kumar, P. Optimality approaches to describe characteristic fluvial patterns on landscapes. *Philos. Trans. R. Soc. B: Biol. Sci.* **2010**, *365*, 1387–1395.
26. Molnar, P.; Ramirez, J. Energy dissipation theories and optimal channel characteristics of river networks. *Water Resour. Res.* **1998**, *34*, 1809–1818.
27. Prigogine, I. Etude thermodynamique des phénomènes irréversibles. Thèse présentée à l'Université Libre de Bruxelles, Desoer, Liège, France, 1947.
28. Martyushev, L.; Seleznev, V. Maximum entropy production principle in physics, chemistry and biology. *Phys. Rep.* **2006**, *426*, 1–45.
29. Martyushev, L. Entropy and Entropy Production: Old Misconceptions and New Breakthroughs. *Entropy* **2013**, *15*, 1152–1170.
30. Odum, H.T.; Pinkerton, R.C. Time's speed regulator: The optimum efficiency for maximum power output in physical and biological systems. *Am. Sci.* **1955**, *43*, 331–343.
31. Hall, C.A.S. The continuing importance of maximum power. *Ecol. Model.* **2004**, *178*, 107–113.
32. Ross, J.; Corlan, A.D.; Müller, S.C. Proposed Principles of Maximum Local Entropy Production. *J. Phys. Chem. B* **2012**, *116*, 7858–7865.
33. Kleidon, A.; Zehe, E.; Lin, H.; Thermodynamic Limits of the Critical Zone and their Relevance to Hydopedology; In *Hydopedology*; Lin, H., Eds.; Academic Press: Walthman, MA, USA, 2012;
34. Dyke, J.G.; Gans, F.; Kleidon, A. Towards understanding how surface life can affect interior geological processes: A non-equilibrium thermodynamics approach. *Earth Sys. Dyn.* **2011**, *2*, 139–160.
35. Odum, H. *Systems Ecology: An Introduction*; John Wiley & Sons: New York, NY, USA, 1983.

36. Odum, H. *Environmental Accounting: Emergy and Environmental Decision Making*; John Wiley & Sons, INC: New York, NY, USA, 1996.
37. Sciubba, E. What did Lotka really say? A critical reassessment of the “maximum power principle”. *Ecol. Model.* **2011**, *222*, 1347–1353.
38. Schneider, E.; Sagan, D. *Into the Cool: Energy Flow, Thermodynamics, and Life*; University of Chicago Press: Chicago, IL, USA, 2005.
39. Ziegler, H. *Progress in Solid Mechanics*; Sneddon, I.N., Hill, R., Eds.; San Diego, CA, USA, 1963; Voluem 4, pp. 243–281.
40. Ziegler, H. *An Introduction to Thermomechanics*; North Holland Pub: Amsterdam, The Netherlands, 1983.
41. Lucia, U. Mathematical consequences of Gyarmati’s principle in rational thermodynamics.. *Il Nuovo Cimento B Series 11* **1995**,
42. Jørgensen, S.E.; Mejer, H. Ecological buffer capacity. *Ecol. Model.* **1977**, *3*, 39–61.
43. Jørgensen, S.E.; Mejer, H. A holistic approach to ecological modelling. *Ecol. Model.* **1979**, *7*, 169–189.
44. Mejer, H.; Jorgensen, S. Energy and ecological buffer capacity. In: *State of the Art of Ecological Modelling. Environmental Sciences and Applications*, Proceedings Conference on Ecological modelling. Copenhagen, Denmark, September 1978. Jorgensen, S.E. Eds. International Society for Ecological Modelling, Copenhagen, Denmark. 1979.
45. Jørgensen, S.E.; Patten, B.C.; Straškraba, M. Ecosystems emerging: 4. growth. *Ecol. Model.* **2000**, *126*, 249–284.
46. Jørgensen, S. *Integration of Ecosystem Theories: A Pattern*, 3rd ed.; Kluwer Academic Publishers: Dordrecht, The Netherlands, 2002.
47. Jørgensen, S.E.; Marques, J.; Nielsen, S.N. Structural changes in an estuary, described by models and using exergy as orientor. *Ecol. Model.* **2002**, *158*, 233–240.
48. Jørgensen, S.E.; Ray, S.; Berec, L.; Straskraba, M. Improved calibration of a eutrophication model by use of the size variation due to succession. *Ecol. Model.* **2002**, *153*, 269–277.
49. Jørgensen, S.E.; Verdonshot, P.; Lek, S. Explanation of the observed structure of functional feeding groups of aquatic macro-invertebrates by an ecological model and the maximum exergy principle. *Ecol. Model.* **2002**, *158*, 223–231.
50. Odum, E.P. The Strategy of Ecosystem Development. *Science* **1969**, *164*, 262–270.
51. Fath, B.D.; Jørgensen, S.E.; Patten, B.C.; Straškraba, M. Ecosystem growth and development. *Biosystems* **2004**, *77*, 213–228.
52. Jørgensen, S.; Fath, B.; Bastianoni, S.; Marques, J.; Muller, F.; Nielsen, S.; Patten, B.; Tiezzi, E.; Ulanowicz, R. *A New Ecology: Systems Perspective*; Elsevier: Amsterdam, The Netherlands, 2011.
53. Schneider, E.; Kay, J. Energy degradation, thermodynamics, and the development of ecosystems. In *Proceedings of the International Conference Energy System and Ecology*, Cracow, Poland, July 1993.
54. Schneider, E.; Kay, J. Life as a manifestation of the second law of thermodynamics. *Math. Comput. Model.* **1994**, *19*, 25–48.

55. Jaynes, E.T. Information Theory and Statistical Mechanics. II. *Phys. Rev.* **1957**, *108*, 171–190.
56. Jaynes, E.T. Information Theory and Statistical Mechanics. *Phys. Rev.* **1957**, *106*, 620–630.
57. Singh, V.P.; Rajagopal, A. A new method of parameter estimation for hydrological frequency analysis. *Hydrol. Sci. Technol* **1987**, *2*, 33–40.
58. Dewar, R. Information theory explanation of the fluctuation theorem, maximum entropy production and self-organized criticality in non-equilibrium stationary states. *J. Phys. A: Math. Gen.* **2003**, *36*, 631–641.
59. Dewar, R.C. Maximum entropy production and the fluctuation theorem. *J. Phys. A: Math. Gen.* **2005**, *38*, L371.
60. Bruers, S. A discussion on maximum entropy production and information theory. *J. Phys. A: Math. Theor.* **2007**, *40*, 7441–7450.
61. Ulanowicz, R.E. An hypothesis on the development of natural communities. *J. Theor. Biol.* **1980**, *85*, 223–245.
62. Ulanowicz, R.E. *Growth and Development: Ecosystems Phenomenology*; iUniverse: Lincoln, NE, USA, 1986.
63. Ulanowicz, R.E.; Jorgensen, S.E.; Fath, B.D. Exergy, information and aggradation: An ecosystems reconciliation. *Ecol. Model.* **2006**, *198*, 520–524.
64. Coello, C.; Lamont, G.; van Veldhuizen, D. *Evolutionary Algorithms for Solving Multi-Objective Problems*, 2nd ed.; Springer: New York, NY, USA, 2007.

© 2014 by the authors; licensee MDPI, Basel, Switzerland. This article is an open access article distributed under the terms and conditions of the Creative Commons Attribution license (<http://creativecommons.org/licenses/by/3.0/>).
